# Supplementary material for: Epithelial Sodium Channel Alpha Subunit (αENaC) Is Associated with Inverse Salt Sensitivity of Blood Pressure
Source: MDPI journal article supplement (doi:10.3390/biomedicines10050981), 2022-04-23
Supplement: s1 [file s1]

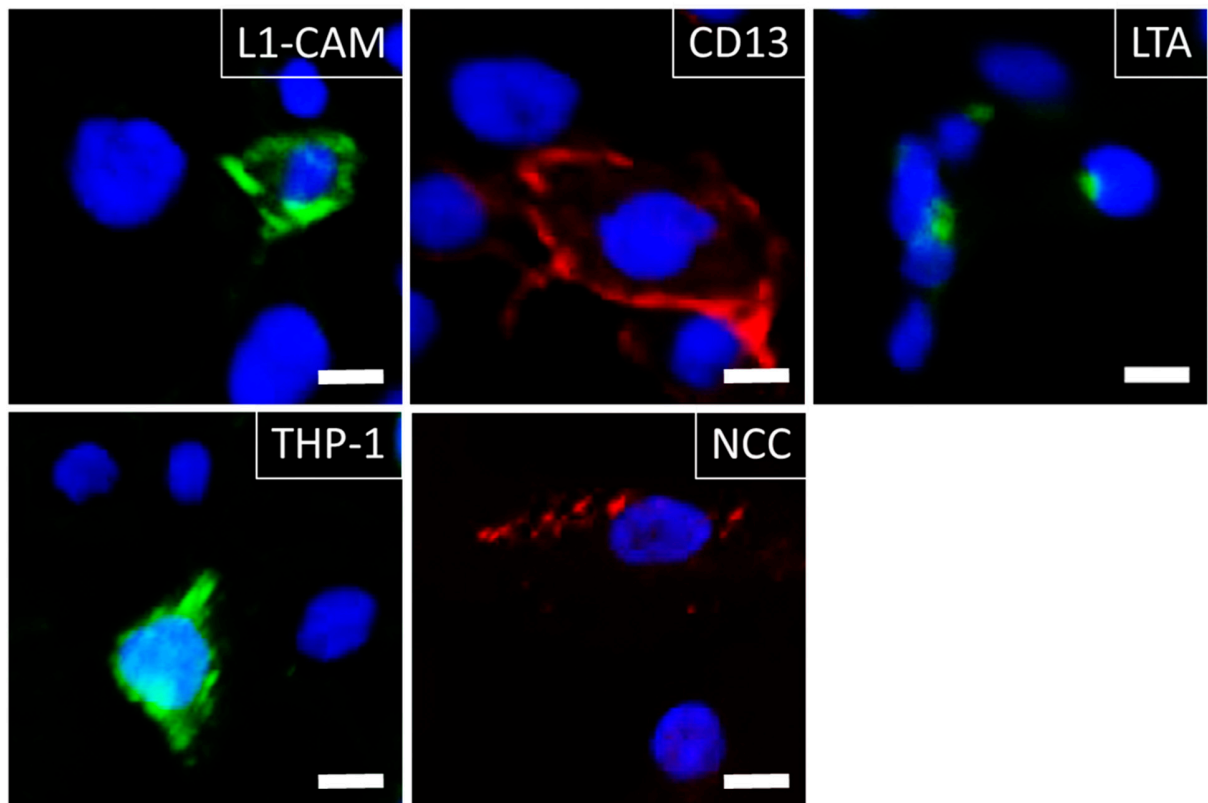

**Supplemental Figure S1:** Representative images show different types of renal cells in the urine. L1-Cam is collecting duct cell (CDC) marker, CD13 and LTA are proximal tubule cell (PTC) markers. THP is a thick ascending limb marker. NCC is distal tubule cell marker. Scale bar=10  $\mu$ m

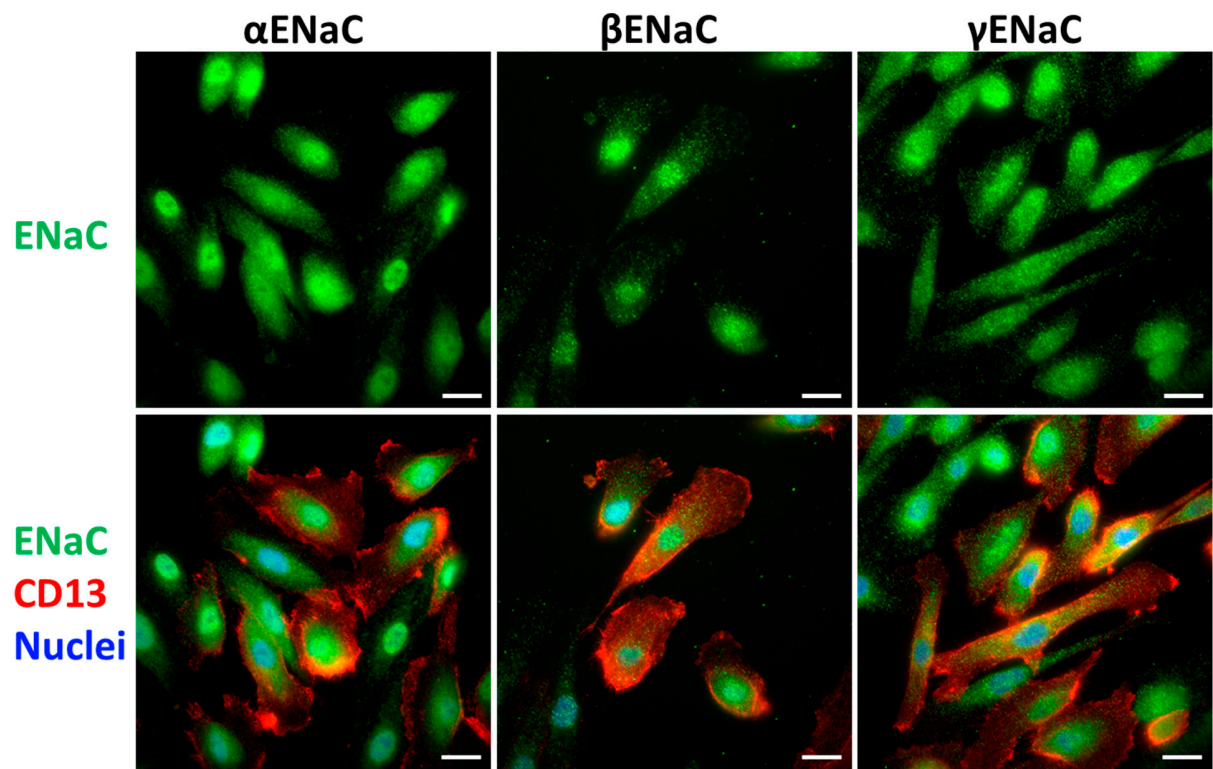

**Supplemental Figure S2:**  $\alpha$ ENaC,  $\beta$ ENaC and  $\gamma$ ENaC staining in permeabilized urine-derived renal tubule cells. Nuclei are in blue.  $\alpha$ ENaC,  $\beta$ ENaC and  $\gamma$ ENaC are in green. CD13 is in red. Scale bar =10  $\mu$ m

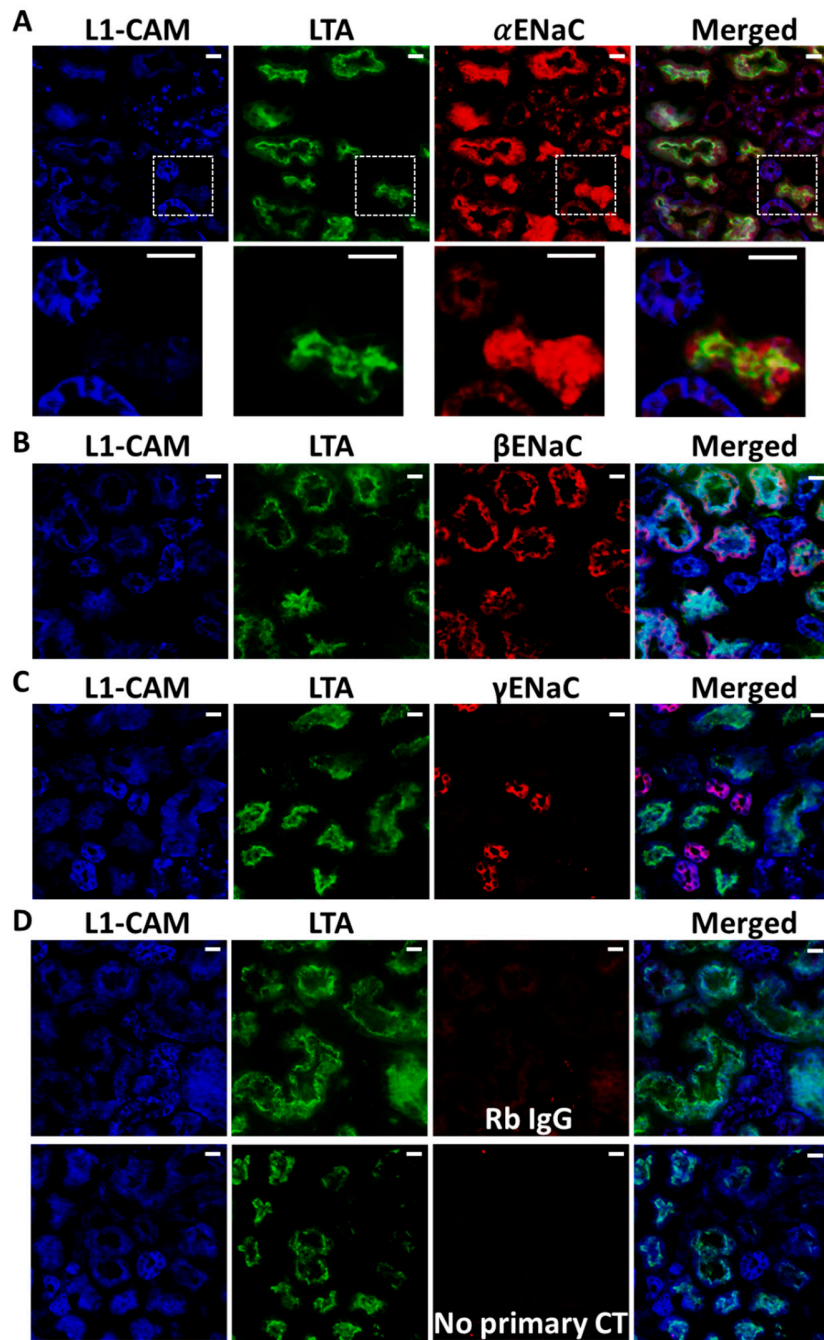

**Supplemental Figure S3.**  $\alpha$ ENaC,  $\beta$ ENaC and  $\gamma$ ENaC (StressMarq antibodies) staining in human renal cortex. Both  $\alpha$ ENaC and  $\beta$ ENaC are present in PTC.  $\gamma$ ENaC is restricted within CDCs.  $\alpha$ ENaC,  $\beta$ ENaC and  $\gamma$ ENaC are in red. LTA, a PTC marker, is in green. L1-CAM, a CDC marker, is in blue. Rb (rabbit) IgG and no primary antibody are tested as negative controls. The lower panel of (A) is zoomed-in views of boxed regions of the upper panel. Scale bar = 10  $\mu$ m

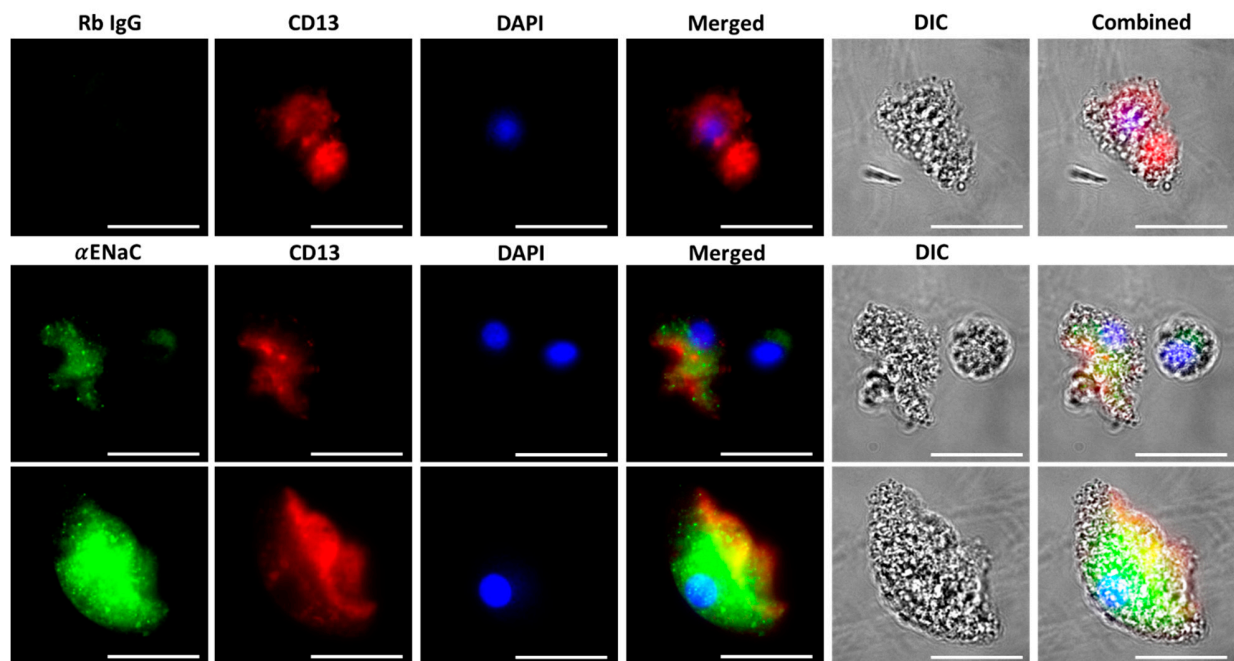

**Supplemental Figure S4:**  $\alpha$ ENaC was stained in cells digested from fresh human renal cortex in suspension. Rabbit IgG was used for negative control. CD13 positive cells also shows strong  $\alpha$ ENaC staining on their apical side. Scale bar = 10  $\mu$ m

**A**

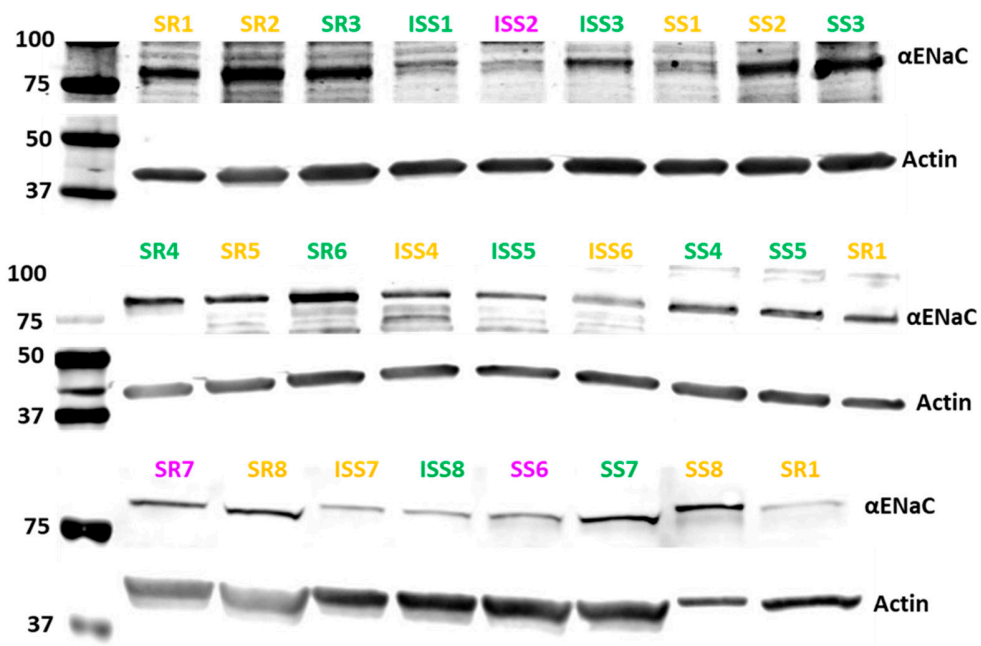

**B**

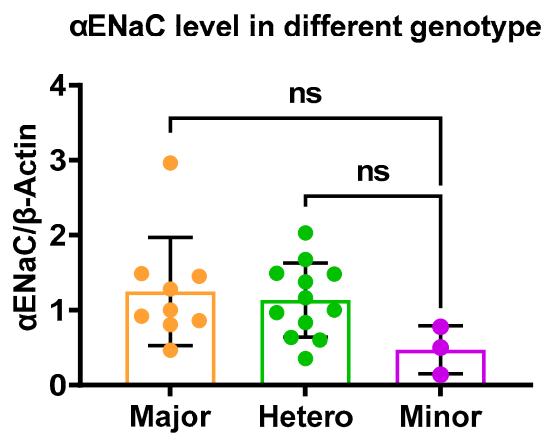

**Supplemental Figure S5.** αENaC western blot analysis in more urine-derived hRTC lines. (A) αENaC western blot in another 15 urine-derived hRTC lines. SR, salt resistant, SS salt sensitive; ISS inverse salt sensitive. The calculation was normalized by SR1 on each blot. (B) αENaC level in different genotype. Homozygous major variants are in orange; heterozygous samples are in green; homozygous minor variants are in purple.

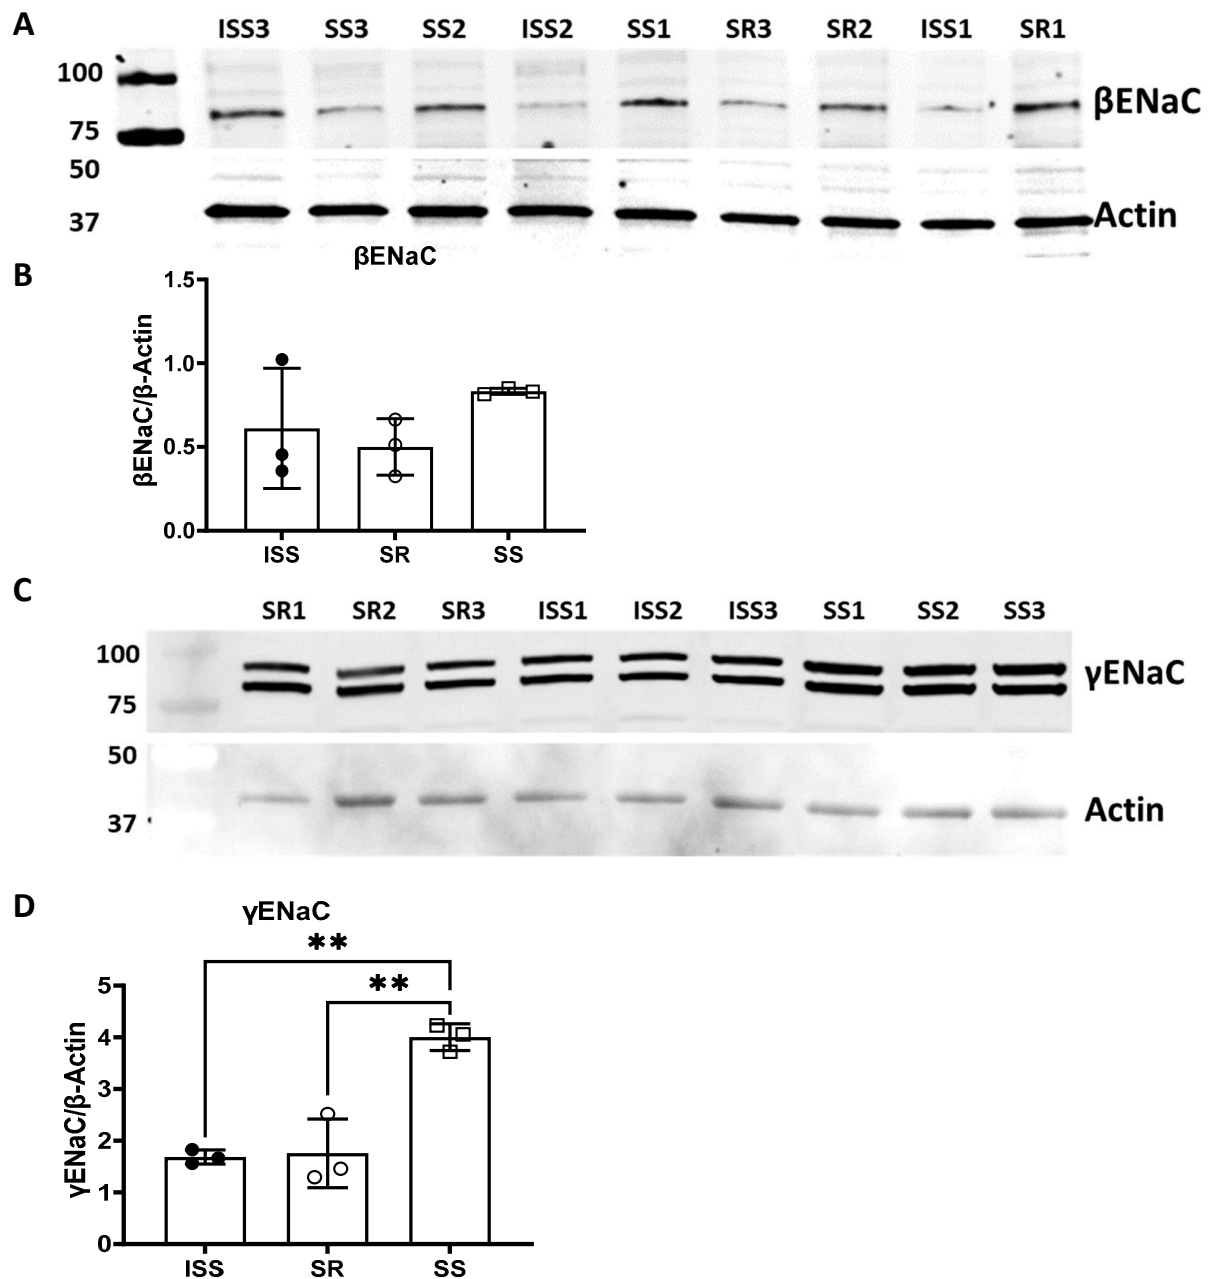

**Supplemental Figure S6:**  $\beta\text{ENaC}$  and  $\gamma\text{ENaC}$  are found in  $\text{CD13}^+$  urine-derived hRHCs. Actin was used as loading control in all western blot analysis. A and B) There is no significant difference of  $\beta\text{ENaC}$  among different phenotypes. C and D)  $\gamma\text{ENaC}$  is significantly higher in SS than both SR and ISS.

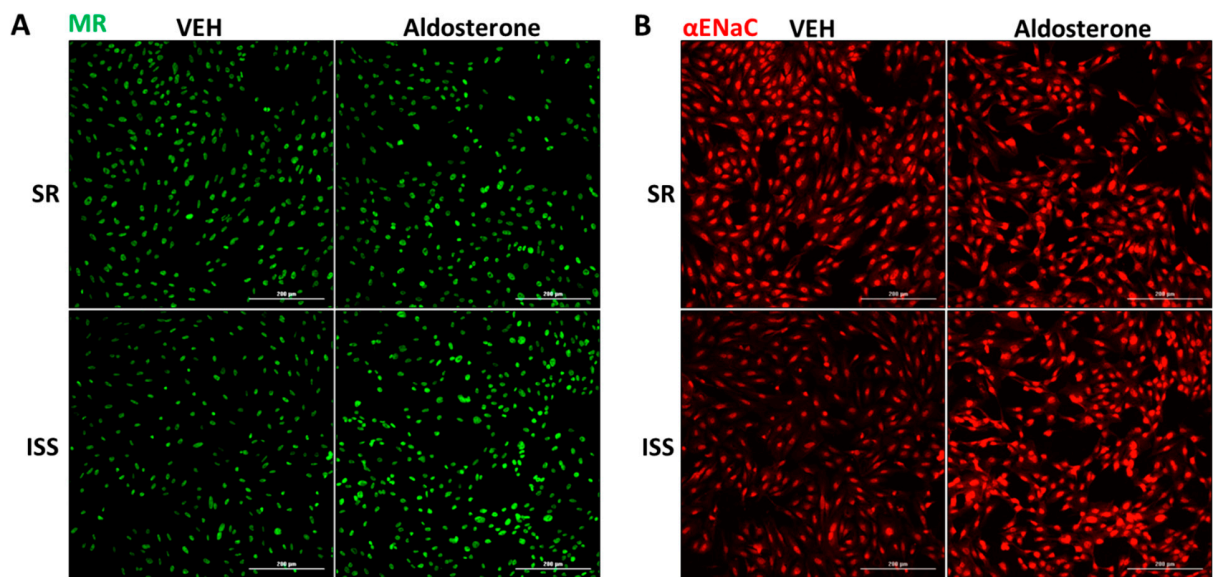

**Supplemental Figure S7.** Representative images of mineralocorticoid receptor (MR) and  $\alpha$ ENaC immunostaining under aldosterone treatment. MR staining is in green (A), and  $\alpha$ ENaC is stained in red (B). Scale bar = 200  $\mu$ m

**Supplemental Table S1****Characteristics of UVA Study Subjects (Mean±SD)**

|                                   | <b>Inverse Salt Sensitive Subjects</b> | <b>Salt Resistant Subjects</b> | <b>Salt Sensitive Subjects</b> | <b>P Value</b>      |
|-----------------------------------|----------------------------------------|--------------------------------|--------------------------------|---------------------|
| Number of subjects                | 37                                     | 178                            | 65                             |                     |
| Male                              | 12                                     | 78                             | 23                             | 0.2837 <sup>+</sup> |
| Female                            | 25                                     | 100                            | 42                             |                     |
| Age (yrs)                         | 40.8±15.2                              | 42±15.1                        | 50.5±14.2                      | 0.0002              |
| BMI                               | 25.1±3.0                               | 24.8±2.9                       | 25.3±2.9                       | 0.4716              |
| <b><u>After Low Sat Diet</u></b>  |                                        |                                |                                |                     |
| Systolic (mmHg)                   | 121±13.3                               | 117.2±13.8                     | 114.9±12.7                     | 0.0915              |
| Diastolic (mmHg)                  | 76.2±8.4                               | 72.9±9.1                       | 71.7±6.5                       | 0.0345              |
| MAP (mmHg)                        | 91.1±9.5                               | 87.7±10                        | 86.1±7.8                       | 0.0382              |
| <b><u>After High Sat Diet</u></b> |                                        |                                |                                |                     |
| Systolic (mmHg)                   | 110.3±12.2                             | 118.5±14.1                     | 129.5±12.9                     | <0.0001             |
| Diastolic (mmHg)                  | 66±7.3                                 | 71.9±9.6                       | 80±8.2                         | <0.0001             |
| MAP (mmHg)                        | 80.7±8.6                               | 87.4±10.5                      | 87.4±10.5                      | 0.0013              |

For the continuous variables, one-way ANOVA was used to compare the three groups.

+ Comparison of distribution of gender in three groups was done by Chi-square test.



**Supplemental Table S2: Odds Ratio**

|                                                   | ISS | NON-ISS (SR+SS) |
|---------------------------------------------------|-----|-----------------|
| SNPed (Homozygous minor variant and heterozygous) | 23  | 112             |
| NON-SNPed (homozygous major variant)              | 14  | 130             |

Odds ratio =  $23 \times 130 / (14 \times 112) = 1.91$ , indicating the odds are 1.91 times higher that people who have rs4764586 will become ISS compare to those who are homozygous major variant.
